# Supplementary material for: DeepPlant: An Accurate Cross-Species 5mC Detection Tool for Oxford Nanopore Sequencing in Plants
Source: Research Square preprint supplement (doi:10.21203/rs.3.rs-5187157/v1), 2024-11-07
Supplement: Supplementary file 1 [file 6bf51961eb56e93ab8109373.xlsx]

## Sheet: Supplementary Table 1
Supplementary Table 1. Reanalyzed public BS-seq data of 10 plant species.
Species	Reference genome	BS-seq NCBI SRA ID	Number of CHH sites with ≥5× coverage	Number of CHH sites with ≥90% methylation frequency	Ratio	Tissue
Arabidopsis thaliana	GCF_000001735.4	SRR15967550	30649039	7681	0.0002	seedling
		SRR15967551	30492168	10990	0.0003	seedling
		SRR15967554	30546927	10368	0.0003	seedling
Ricinus communis	GCF_019578655.1	SRR17218349	48891647	97817	0.002	root
		SRR17218350	57030343	405707	0.0071	leaf
		SRR17218353	42548977	185787	0.0043	embryo
		SRR17218352	37375761	508578	0.0136	endosperm
		SRR17218351	38137618	1492382	0.0391	endosperm
Gossypium hirsutum	GCF_025698545.1	SRR23692774	177262294	23389	0.0001	leaf
		SRR23692775	174963465	23469	0.0001	leaf
		SRR23692776	162907067	22718	0.0001	leaf
Salvia miltiorrhiza	GCF_028751815.1	SRR24693925	34916762	197866	0.0056	hair roots
		SRR24693926	53793101	694521	0.0129	leaf in July
		SRR24693928	35830168	996663	0.0278	root in March
		SRR24693927	40264625	896634	0.0222	root in July
Solanum tuberosum	GCF_000226075.1	SRR16121164	43905556	226689	0.0051	leaf
		SRR19153437	78075169	1410581	0.018	tuber
		SRR19153438	78907363	1546924	0.0196	tuber
Oryza sativa	GCF_034140825.1	DRR425638	88388799	1441	0	endosperm
		SRR15967546	98430446	125818	0.0012	seedling
		SRR15967548	98349879	126262	0.0012	seedling
Beta vulgaris	GCF_026745355.1	SRR15205250	80392207	636319	0.0079	leaf
		SRR15205266	77542775	900956	0.0116	leaf
		SRR15205268	82824655	1055205	0.0127	leaf
Citrus sinensis	GCF_022201045.2	SRR15967546	12587	170	0.0135	fruit pericarp
		SRR6451550	101301938	1135956	0.0112	fruit pericarp
		SRR6451555	96949895	1207090	0.0124	fruit pericarp
		SRR9912477	101930581	1376072	0.0135	fruit pericarp
Solanum lycopersicum	GCF_000188115.5	SRR5258577	135652218	624663	0.0046	fruit
		SRR5258578	129860627	598628	0.0046	fruit
		SRR5258582	152891639	1200262	0.0078	fruit
Physcomitrium patens	GCF_000002425.4	SRR18164483	35963531	293590	0.0081	protonema
		SRR4454535	65546998	4772117	0.0728	gametophore
		SRR9901085	69028939	4271030	0.0618	gametophore

## Sheet: Supplementary Table 2
Supplementary Table 2. Sequencing and CHH motif information from Nanopore sequencing and BS-seq.
Species	Nanopore				BS-seq			Intersection
	Reads count	Coverage	C methylated in CHH	Total Sites Count	Coverage	C methylated in CHH	Total Sites Count
S. tuberosum	6172822	19	0.15304	452925368	75	0.152	427463086	284845748
R. communis	5048426	45	0.163451	95687461	112	0.131	90081634	83324423
S. miltiorrhiza	8438579	27	0.281278	292681170	62	0.2	237904356	183163109
A. thaliana	1596813	35	0.0213687	31254125	99	0.03	30722526	30009802
B. vulgaris	14014264	40	0.0926206	209931467	116	0.102	193847901	172300407
O. sativa	6062650	43	0.0239132	104487271	52	0.035	100333151	92903166
V. vinifera	4301307	32	0.0743627	264725350	48	0.081	214733132	167761478
C. sinensis	8027847	49	0.0988995	107787084	125	0.105	19984919	81787834

## Sheet: Supplementary Table 3
Supplementary Table 3. Hyperparameters of DeepPlant models.
Hyperparameter	BiLSTM	Transformer
Sequence encoder layers	2	2
Signal encoder layers	2	2
Collaborative encoder layers	3	3
Sequence encoder features	128	128
Signal encoder features	128	128
Collaborative encoder features	256	256
Embedding dimension	4	124
Dropout rate	0.5	0.1
Feedforward dimension	256	1024
Number of heads	N/A	8
Learning rate	0.001	0.0005
Gradient clipping (L2 norm)	0.5	1

## Sheet: Supplementary Table 4
Supplementary Table 4. Performance of DeepPlant 9-mer Bi-LSTM model on methylation frequency quantification. Nanopore datasets were randomly down-sampled to 5-30× if possible. Whole-genome methylation frequency correlation with BS-seq were carried out for each down-sampled dataset.
Species	Tools	Correlation with BS-seq
		5×	10×	15×	20×	25×	30×
A. thaliana	9-mer	0.582148	0.591938	0.604005	0.616663	0.632363	0.647069
B. vulgaris	9-mer	0.740698	0.750389	0.760083	0.77086	0.780677	0.781105
O. sativa	9-mer	0.622072	0.637288	0.649741	0.664519	0.679909	0.692659
S. tuberosum	9-mer	0.760007	0.774816	0.784532	N/A	N/A	N/A
R. communis	9-mer	0.811219	0.831532	0.839349	0.848431	0.858278	0.86711
S. miltiorrhiza	9-mer	0.824329	0.829929	0.838714	0.849323	0.859003	N/A
V. vinifera	9-mer	0.691748	0.699602	0.713627	0.730105	0.74542	0.75866
C. sinensis	9-mer	0.733657	0.753906	0.770209	0.782696	0.794819	0.804043

## Sheet: Supplementary Table 5
Supplementary Table 5. Comparison of methylation frequency correlation with BS-seq and single-molecule methylation detection performance between DeepPlant and Dorado on CpG and CHG motifs. 5-30× denote the Pearson correlation (r) between whole-genome methylation frequencies of nanopore data at corresponding down-sampled depth with corresponding BS-seq datasets.
Species	Motif	Metric	DeepPlant	Dorado
S. tuberosum	CpG	5×	0.910617	0.910825
		10×	0.922003	0.922339
		15×	0.928588	0.93593
		AUC	0.982472	0.930284
		AP	0.984232	0.949655
		F1	0.956642	0.882136
		Precision	0.968091	0.954802
		Accuracy	0.957148	0.890472
		Recall	0.94546	0.81975
		Specificity	0.968837	0.9709
	CHG	5×	0.915753	0.922062
		10×	0.924182	0.923583
		15×	0.927294	0.923596
		AUC	0.986018	0.944797
		AP	0.988887	0.945593
		F1	0.952569	0.886332
		Precision	0.983683	0.927039
		Accuracy	0.954023	0.888202
		Recall	0.923363	0.84905
		Specificity	0.984683	0.933177
S. miltiorrhiza	CpG	5×	0.956756	0.941387
		10×	0.960948	0.951263
		15×	0.966306	0.961148
		20×	0.971188	0.96749
		25×	0.974386	0.971122
		AUC	0.971664	0.949804
		AP	0.981121	0.957131
		F1	0.955254	0.902231
		Precision	0.98092	0.937419
		Accuracy	0.956395	0.905768
		Recall	0.930897	0.86959
		Specificity	0.981893	0.941947
	CHG	5×	0.939251	0.925557
		10×	0.939684	0.920338
		15×	0.941498	0.918286
		20×	0.943721	0.918521
		25×	0.945572	0.920472
		AUC	0.994671	0.937651
		AP	0.995858	0.940239
		F1	0.977356	0.884327
		Precision	0.991525	0.907328
		Accuracy	0.977675	0.887187
		Recall	0.963587	0.862463
		Specificity	0.991763	0.91191
V. vinifera	CpG	5×	0.964657	0.957045
		10×	0.968208	0.961002
		15×	0.9716	0.965654
		20×	0.973788	0.969024
		25×	0.975203	0.971227
		30×	0.97615	0.972721
		AUC	0.991454	0.971318
		AP	0.993314	0.970702
		F1	0.974828	0.937541
		Precision	0.974583	0.953622
		Accuracy	0.974822	0.938577
		Recall	0.975073	0.921993
		Specificity	0.97457	0.95516
	CHG	5×	0.938547	0.942467
		10×	0.938128	0.938861
		15×	0.939972	0.937974
		20×	0.942682	0.938343
		25×	0.945144	0.939321
		30×	0.947198	0.940627
		AUC	0.98423	0.959117
		AP	0.988375	0.958868
		F1	0.96227	0.917292
		Precision	0.983577	0.93777
		Accuracy	0.96307	0.91906
		Recall	0.941867	0.89769
		Specificity	0.984273	0.94043
C. sinensis	CpG	5×	0.965074	0.969645
		10×	0.967413	0.972278
		15×	0.967838	0.973328
		20×	0.967642	0.973712
		25×	0.967235	0.973859
		30×	0.966851	0.973921
		AUC	0.989797	0.978691
		AP	0.991662	0.978951
		F1	0.957308	0.942341
		Precision	0.945921	0.964216
		Accuracy	0.956788	0.94362
		Recall	0.968973	0.921437
		Specificity	0.944603	0.965803
	CHG	5×	0.935183	0.942158
		10×	0.939365	0.940817
		15×	0.93984	0.937346
		20×	0.939395	0.934559
		25×	0.938732	0.932265
		30×	0.938021	0.930393
		AUC	0.985349	0.967708
		AP	0.987563	0.965757
		F1	0.932117	0.927081
		Precision	0.985547	0.934954
		Accuracy	0.935608	0.92769
		Recall	0.884183	0.91934
		Specificity	0.987033	0.93604
R. communis	CpG	5×	0.948218	0.942866
		10×	0.960486	0.954254
		15×	0.968806	0.964108
		20×	0.973847	0.970425
		25×	0.976861	0.974309
		30×	0.978789	0.976796
		AUC	0.965023	0.946548
		AP	0.976499	0.959035
		F1	0.938822	0.905755
		Precision	0.979597	0.968161
		Accuracy	0.941267	0.911462
		Recall	0.901307	0.850907
		Specificity	0.981227	0.972017
	CHG	5×	0.945811	0.936803
		10×	0.955445	0.947623
		15×	0.958165	0.949409
		20×	0.960536	0.951122
		25×	0.962599	0.953337
		30×	0.964197	0.95565
		AUC	0.988689	0.943209
		AP	0.991418	0.953123
		F1	0.962385	0.892265
		Precision	0.990748	0.949689
		Accuracy	0.963432	0.898408
		Recall	0.9356	0.84139
		Specificity	0.991263	0.955427
O. sativa	CpG	5×	0.987759	0.959357
		10×	0.989644	0.965737
		15×	0.990882	0.9702
		20×	0.991697	0.973086
		25×	0.99217	0.974771
		30×	0.992455	0.975789
		AUC	0.997623	0.961789
		AP	0.998294	0.967629
		F1	0.992762	0.899204
		Precision	0.996424	0.873095
		Accuracy	0.992788	0.896097
		Recall	0.989127	0.926923
		Specificity	0.99645	0.86527
	CHG	5×	0.897307	0.888761
		10×	0.902004	0.888416
		15×	0.905391	0.88488
		20×	0.908979	0.882514
		25×	0.912095	0.881595
		30×	0.914269	0.881464
		AUC	0.98732	0.950997
		AP	0.99059	0.953804
		F1	0.964586	0.892091
		Precision	0.974623	0.880596
		Accuracy	0.964947	0.890663
		Recall	0.954753	0.90389
		Specificity	0.97514	0.877437
A. thaliana	CpG	5×	0.974134	0.966293
		10×	0.979024	0.972677
		15×	0.982988	0.978204
		20×	0.985711	0.982159
		25×	0.987403	0.984669
		30×	0.988506	0.986306
		AUC	0.988033	0.96355
		AP	0.991468	0.972156
		F1	0.963796	0.927051
		Precision	0.996766	0.975052
		Accuracy	0.964955	0.930473
		Recall	0.932937	0.883553
		Specificity	0.996973	0.977393
	CHG	5×	0.852706	0.859608
		10×	0.865174	0.863001
		15×	0.871721	0.862171
		20×	0.878111	0.861456
		25×	0.884673	0.861201
		30×	0.890229	0.861836
		AUC	0.937951	0.923057
		AP	0.958538	0.940563
		F1	0.894276	0.866487
		Precision	0.984891	0.950199
		Accuracy	0.903188	0.877313
		Recall	0.81894	0.79636
		Specificity	0.987437	0.958267
B. vulgaris	CpG	5×	0.950759	0.929037
		10×	0.953401	0.935141
		15×	0.955997	0.941927
		20×	0.957717	0.946721
		25×	0.958963	0.950006
		30×	0.959887	0.952363
		AUC	0.996686	0.978898
		AP	0.997481	0.979912
		F1	0.988845	0.943877
		Precision	0.993878	0.964225
		Accuracy	0.988902	0.945037
		Recall	0.983863	0.92437
		Specificity	0.99394	0.965703
	CHG	5×	0.911692	0.910262
		10×	0.914575	0.907228
		15×	0.916907	0.905396
		20×	0.919046	0.905799
		25×	0.920943	0.907592
		30×	0.922388	0.909295
		AUC	0.985103	0.956602
		AP	0.989169	0.957505
		F1	0.961349	0.909182
		Precision	0.985639	0.929974
		Accuracy	0.962278	0.911168
		Recall	0.938227	0.8893
		Specificity	0.98633	0.933037

## Sheet: Supplementary Table 6
Supplementary Table 6. Performance of DeepPlant 9-mer Bi-LSTM model at single-molecule level.
Species	tools	AUC	AP	F1	Precision	Accuracy	Recall	Specificity
A. thaliana	9-mer	0.854937	0.893771	0.780569	0.921694	0.80972	0.676947	0.942493
B. vulgaris	9-mer	0.915203	0.934944	0.857722	0.918703	0.866578	0.804333	0.928823
O. sativa	9-mer	0.923709	0.943055	0.863984	0.909126	0.870418	0.823113	0.917723
S. tuberosum	9-mer	0.92475	0.940605	0.872465	0.908845	0.877373	0.838887	0.91586
R. communis	9-mer	0.936225	0.948007	0.884921	0.924542	0.88965	0.848557	0.930743
S. miltiorrhiza	9-mer	0.939345	0.948539	0.886353	0.908262	0.88903	0.865477	0.912583
V. vinifera	9-mer	0.882685	0.905448	0.82206	0.910999	0.837887	0.748943	0.92683
C. sinensis	9-mer	0.909538	0.92288	0.819588	0.919079	0.83721	0.739533	0.934887

## Sheet: Supplementary Table 7
Supplementary Table 7. Average nanopore sequencing depth of centromeres regions in O. sativa.
Chromosome	Start	End	Average Depth
Chr1	16765400	17553481	37.0393
Chr2	13617389	14214518	35.1951
Chr3	19954695	20551000	35.3076
Chr4	9652000	10112504	36.4509
Chr5	12261000	12840000	37.0621
Chr6	15612461	16338095	35.0224
Chr7	12108000	12457000	30.6364
Chr8	12961751	13761000	36.3467
Chr9	6771892	7241524	34.7294
Chr10	8320734	8690470	35.8968
Chr11	12803000	14055729	37.6913
Chr12	11939000	12499575	36.2933
Note: The centromeric regions are defined based on the union of results from CENH3 ChIP-seq data and CentO repeat sequences from the study of Shang et al. (2023).
Ref.
Shang, L., He, W., Wang, T., Yang, Y., Xu, Q., Zhao, X., ... & Qian, Q. (2023). A complete assembly of the rice Nipponbare reference genome. Molecular plant, 16(8), 1232-1236.
